# Supplementary material for: Molecular crystals vs. superatomic lattice: a case study with superalkali-superhalogen compounds
Source: Royal Society of Chemistry journal article supplement (doi:10.1039/d1cp05761h), 2022-01-01
Supplement: d1cp05761h1.pdf [file d1cp05761h1.pdf]

## Molecular crystals vs. superatomic lattice: A case study with superalkali-superhalogen compounds

Celina Sikorska <sup>a,b</sup>, Nicola Gaston <sup>a,b</sup>

<sup>a)</sup> The MacDiarmid Institute for Advanced Materials and Nanotechnology, A New Zealand Centre of Research Excellence, Wellington, New Zealand

<sup>b)</sup> Department of Physics, The University of Auckland  
Private Bag 92019, Auckland 1142, New Zealand

### 1. Computational methods

The plane-wave DFT computations were performed using the GW projector augmented wave (PAW) potentials within the VASP 5.4.4 software. <sup>1-4</sup> All calculations have been performed spin-polarized and without symmetry constraints. Electronic wave functions were expanded to an energy cutoff of 650 eV.

All the calculations have been performed with the VASP 5.4.4 commercial software (<https://www.vasp.at>). Initial structures have been carried out with GaussView 5.0 commercial software (<http://www.gaussian.com>). Visualization of the structures and electron localization function (ELF) maps have been carried out with the VESTA ver. 3.4.6 open-source software ([http://www.geocities.jp/kmo\\_mma](http://www.geocities.jp/kmo_mma)). The chemical bonding analysing have been performed with CHARGEMOL open-source software (ver. 09\_26\_2017, <http://www.ddec.sourceforge.net>).

### 2. Results

#### 2.1. Lattice parameters

Table S 1 Lattice parameters (a, b, c, in Å;  $\alpha$ ,  $\beta$ ,  $\gamma$ , in degrees), and unit-cell volume (in Å<sup>3</sup>) for dNaCl, dCsI, dZnS phases of N<sub>4</sub>Mg<sub>6</sub>M-AIX<sub>4</sub> supersalts (M=Li, Na, K; X=F, Cl) as obtained by a full structure relaxation with the PBEsol functional.

| species     | a     | b     | c     | $\alpha$ | $\beta$ | $\gamma$ | Unit-cell volume |
|-------------|-------|-------|-------|----------|---------|----------|------------------|
| Li/Cl dNaCl | 12.14 | 18.80 | 17.49 | 43.14    | 55.82   | 47.48    | 1994.49          |
| Li/Cl dCsI  | 9.45  | 9.44  | 9.51  | 88.48    | 88.64   | 88.70    | 847.10           |

|             |       |       |       |       |       |       |         |
|-------------|-------|-------|-------|-------|-------|-------|---------|
| Li/Cl dZnS  | 7.25  | 7.43  | 7.81  | 62.18 | 61.34 | 64.16 | 314.00  |
| Na/Cl dNaCl | 11.62 | 17.39 | 17.94 | 44.79 | 55.49 | 61.83 | 2089.55 |
| Na/Cl dCsI  | 7.87  | 7.87  | 7.88  | 75.01 | 74.92 | 75.07 | 445.50  |
| Na/Cl dZnS  | 7.32  | 9.12  | 7.54  | 65.28 | 60.30 | 68.60 | 389.13  |
| K/Cl dNaCl  | 16.02 | 15.97 | 16.32 | 74.82 | 50.76 | 56.42 | 2669.87 |
| K/Cl dCsI   | 8.51  | 8.56  | 8.53  | 63.40 | 80.82 | 80.61 | 545.66  |
| K/Cl dZnS   | 8.13  | 8.12  | 8.13  | 60.04 | 59.97 | 60.07 | 379.63  |
| Li/F dNaCl  | 8.30  | 7.04  | 8.33  | 66.44 | 66.03 | 69.39 | 396.50  |
| Li/F dCsI   | 9.24  | 9.23  | 9.24  | 91.92 | 91.91 | 92.14 | 786.33  |
| Li/F dZnS   | 8.08  | 6.96  | 6.95  | 61.14 | 63.58 | 64.58 | 294.87  |
| Na/F dNaCl  | 10.00 | 9.84  | 9.74  | 64.23 | 64.61 | 61.40 | 726.93  |
| Na/F dCsI   | 7.36  | 7.35  | 7.36  | 79.15 | 79.13 | 79.15 | 378.77  |
| Na/F dZnS   | 6.20  | 6.93  | 7.18  | 70.78 | 75.77 | 76.66 | 278.50  |
| K/F dNaCl   | 11.06 | 11.36 | 10.54 | 63.33 | 63.19 | 59.75 | 977.82  |
| K/F dCsI    | 7.39  | 7.36  | 7.47  | 70.89 | 71.23 | 71.42 | 353.17  |
| K/F dZnS    | 5.94  | 7.71  | 7.55  | 71.42 | 69.85 | 79.55 | 306.64  |

## 2.2. Intermolecular distances in superalkali-superhalogen systems.

Table S 2 Cohesive energies ( $E_{\text{coh}}$ , in eV), the shortest interatomic distance ( $r_1$ , in Å), the second shortest interatomic distance ( $r_2$ , in Å), and the  $r_1/r_2$  ratio for dNaCl, dCsI, dZnS phases of  $N_4Mg_6M-AIX_4$  supersalts ( $M=Li, Na, K; X=F, Cl$ ) as obtained by a full structure relaxation with the PBEsol functional.

|       | $E_{\text{coh}}$ | $E_{\text{coh}}$ | $E_{\text{coh}}$ | $r_1$ | $r_2$ | $r_1/r_2$ | $r_1$ | $r_2$ | $r_1/r_2$ | $r_1$ | $r_2$ | $r_1/r_2$ |
|-------|------------------|------------------|------------------|-------|-------|-----------|-------|-------|-----------|-------|-------|-----------|
|       | dNaCl            | dCsI             | dZnS             | dNaCl | dNaCl | dNaCl     | dCsI  | dCsI  | dCsI      | dZnS  | dZnS  | dZnS      |
| Li/Cl | -3.02            | -4.14            | -8.42            | 3.170 | 4.828 | 0.66      | 2.204 | 3.758 | 0.6       | 2.422 | 2.671 | 0.91      |
| Na/Cl | -3.14            | -4.43            | -8.38            | 3.674 | 5.048 | 0.73      | 2.545 | 3.238 | 0.8       | 2.318 | 2.433 | 0.95      |
| K/Cl  | -4.58            | -4.41            | -8.69            | 3.142 | 5.868 | 0.54      | 2.866 | 2.866 | 1.0       | 2.774 | 2.774 | 1.00      |
| Li/F  | -11.57           | -6.05            | -11.05           | 1.892 | 1.921 | 0.98      | 1.716 | 4.250 | 0.4       | 2.024 | 2.035 | 0.99      |
| Na/F  | -10.28           | -6.19            | -12.84           | 1.969 | 2.303 | 0.86      | 2.120 | 3.068 | 0.7       | 2.000 | 2.020 | 0.99      |
| K/F   | -6.19            | -6.02            | -12.30           | 2.454 | 4.597 | 0.53      | 2.438 | 3.474 | 0.7       | 1.972 | 2.013 | 0.98      |

### 2.3. Chemical bond analysis

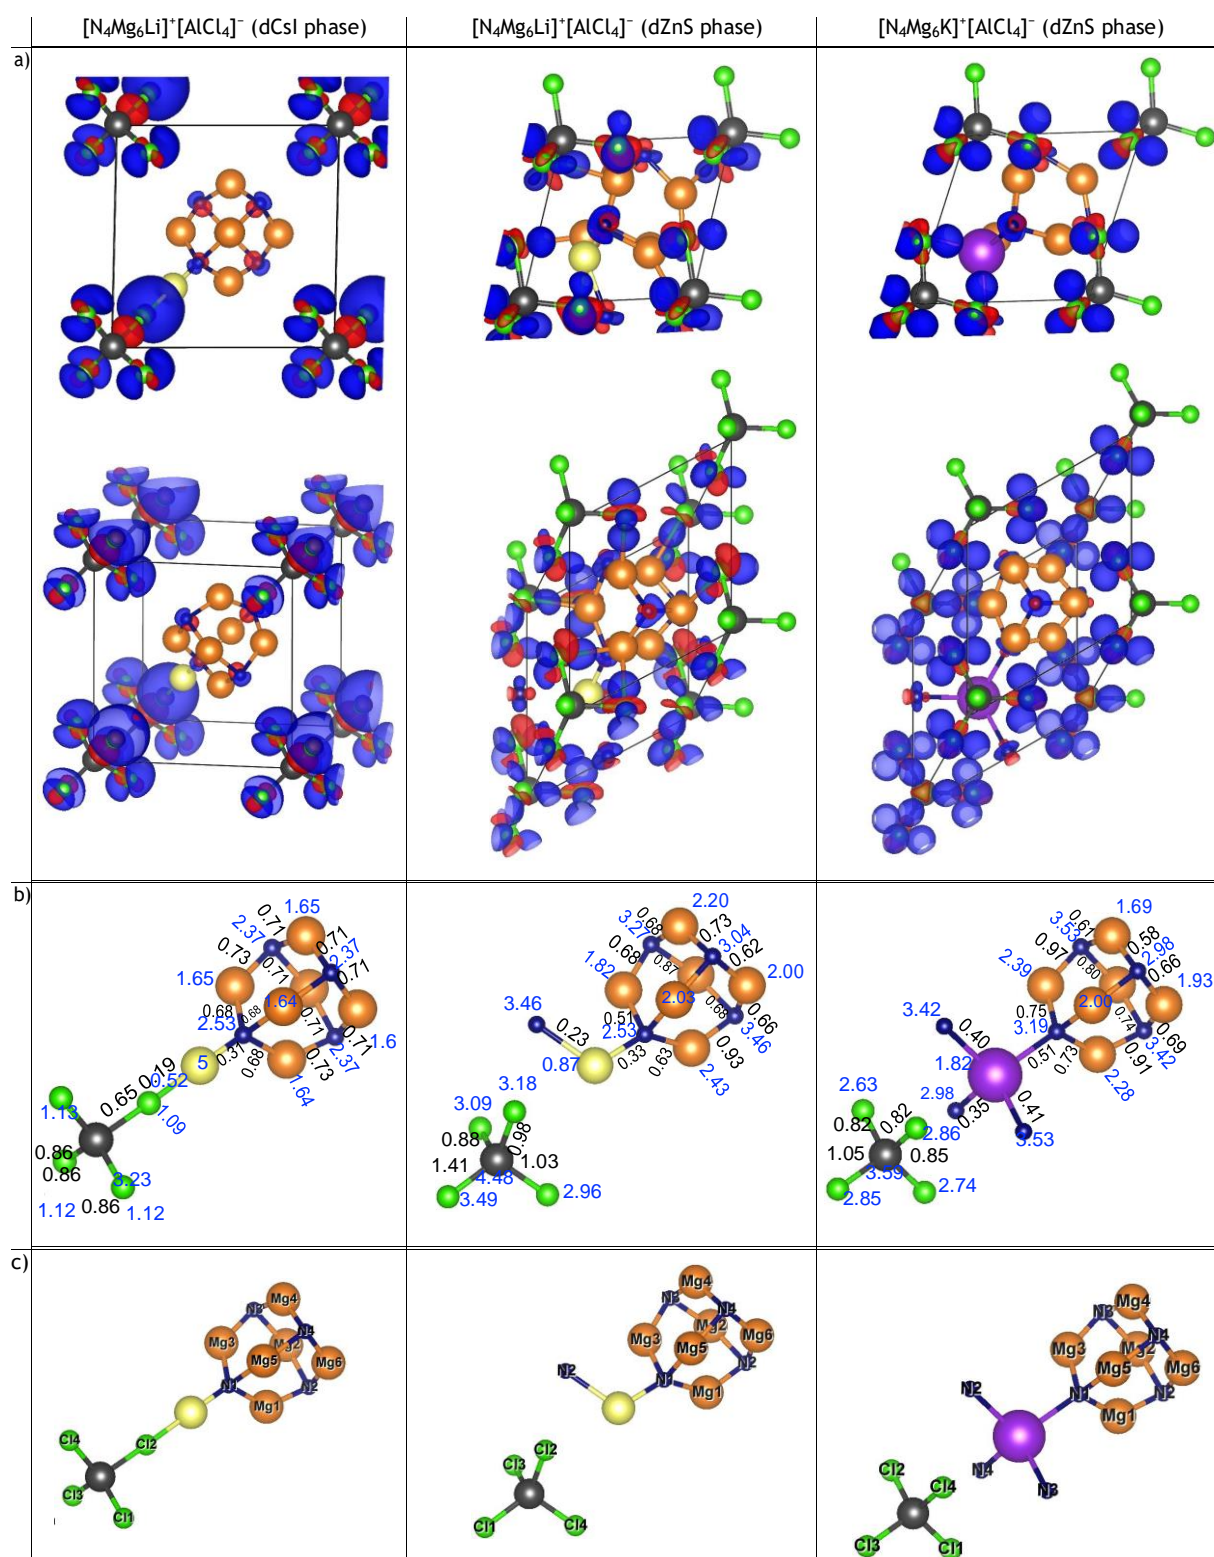

Figure S 1. (a) The electron density difference between superalkali-superhalogen and its superalkali superhalogen subunits and (b) DDEC6 bonding analysis for ground state structures. The bond orders (BOs) and sum of bond orders (SBOs) are provided in black and blue, respectively. Atoms are coloured yellow (Li), pink (Na), orange (Mg), blue (N), and grey (Al).

## 2.4. Electronic localization function (ELF)

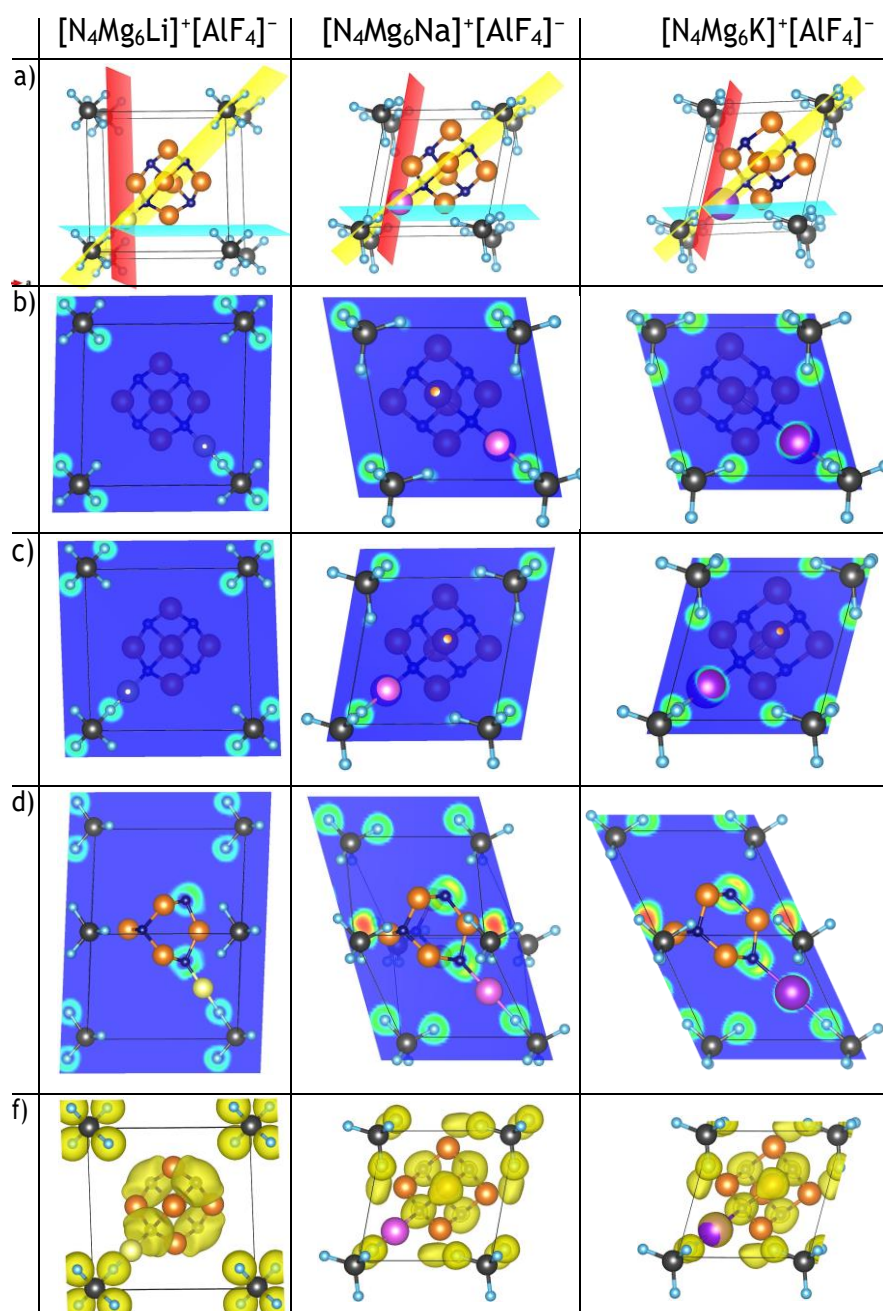

Figure S 2. (a) The vertical (red), horizontal (cyan), and slant (yellow) planes of the bulk-body-centred cubic of  $[\text{N}_4\text{Mg}_6\text{M}]^+[\text{AlF}_4]^-$  salts. (b) The 2D ELF of the vertical plane, (c) horizontal plane, (d) slant plane and (f) the 3D ELF.

## 2.5. Band structure and band gap

The band structure and bandgaps were calculated at the PBEsol and PBE-D3 level of theory and are presented in Figure S 3 and Table S 3, respectively. Based on our and other experience,<sup>5-6</sup> we consider the band structure and bandgap obtained at PBE-D3 level of theory as the most

reliable results. The only issue we want to raise is the observation that the bandgap values are underestimated at the PBEsol level of theory (with respect to PBE-D3) values.

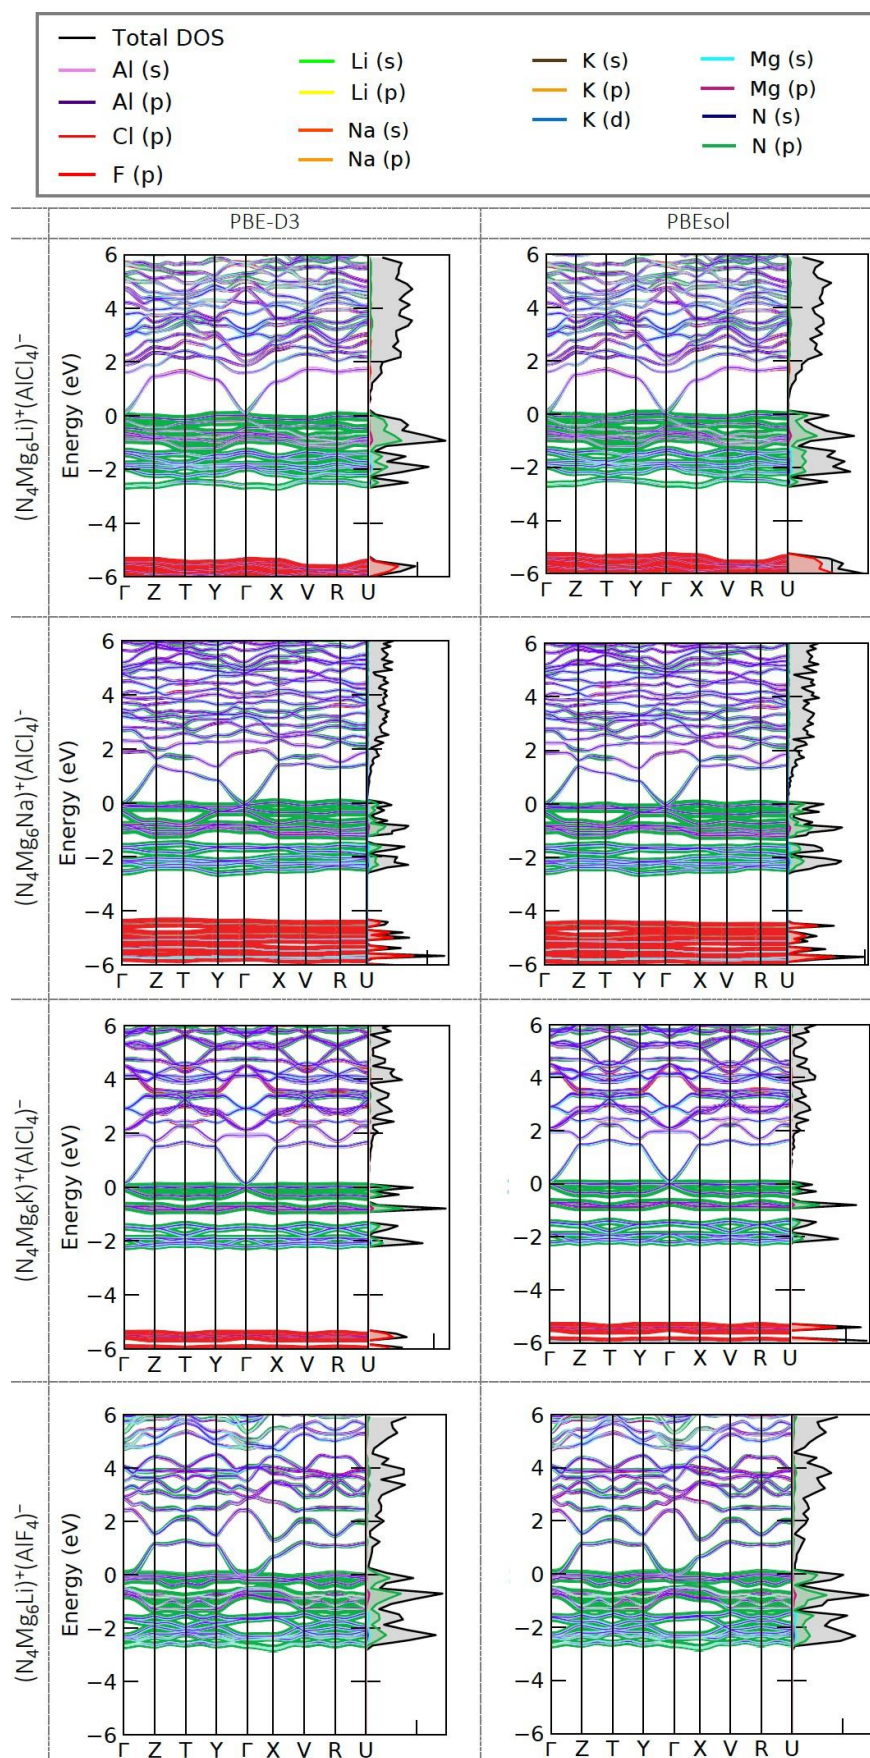

Figure S 3 Electronic band structure for dZnS phase of  $[N_4Mg_6M]^+[AlX_4]^-$  as obtained from PBEsol and PBE-D3.

Table S 3 Bandgap (in eV), valence band maximum (VBM, in eV), and conduction band minimum (CBM, in eV) for  $N_4Mg_6M-AlX_4$  supersalts (M=Li, Na, K; X=F, Cl) as obtained from PBEsol and PBE-D3.

|       | Theory level | GAP Direct | GAP Indirect | VBM   | CBM   |
|-------|--------------|------------|--------------|-------|-------|
| Li/Cl | PBEsol       | 0.087      | 0.097        | 2.553 | 2.640 |
|       | PBE-D3       | 0.117      | 0.122        | 2.678 | 2.795 |
| Na/Cl | PBE-D3       | metallic   |              |       |       |
| K/Cl  | PBEsol       | 0.108      | 0.119        | 1.571 | 1.679 |
|       | PBE-D3       | 0.141      | 0.151        | 1.692 | 1.833 |
| Li/F  | PBE-D3       | metallic   |              |       |       |
| Na/F  | PBE-D3       | metallic   |              |       |       |
| K/F   | PBE-D3       | 0.037      | 0.103        | 1.676 | 1.714 |

## 2.6. Total (TDOS) and partial (PDOS) density of states

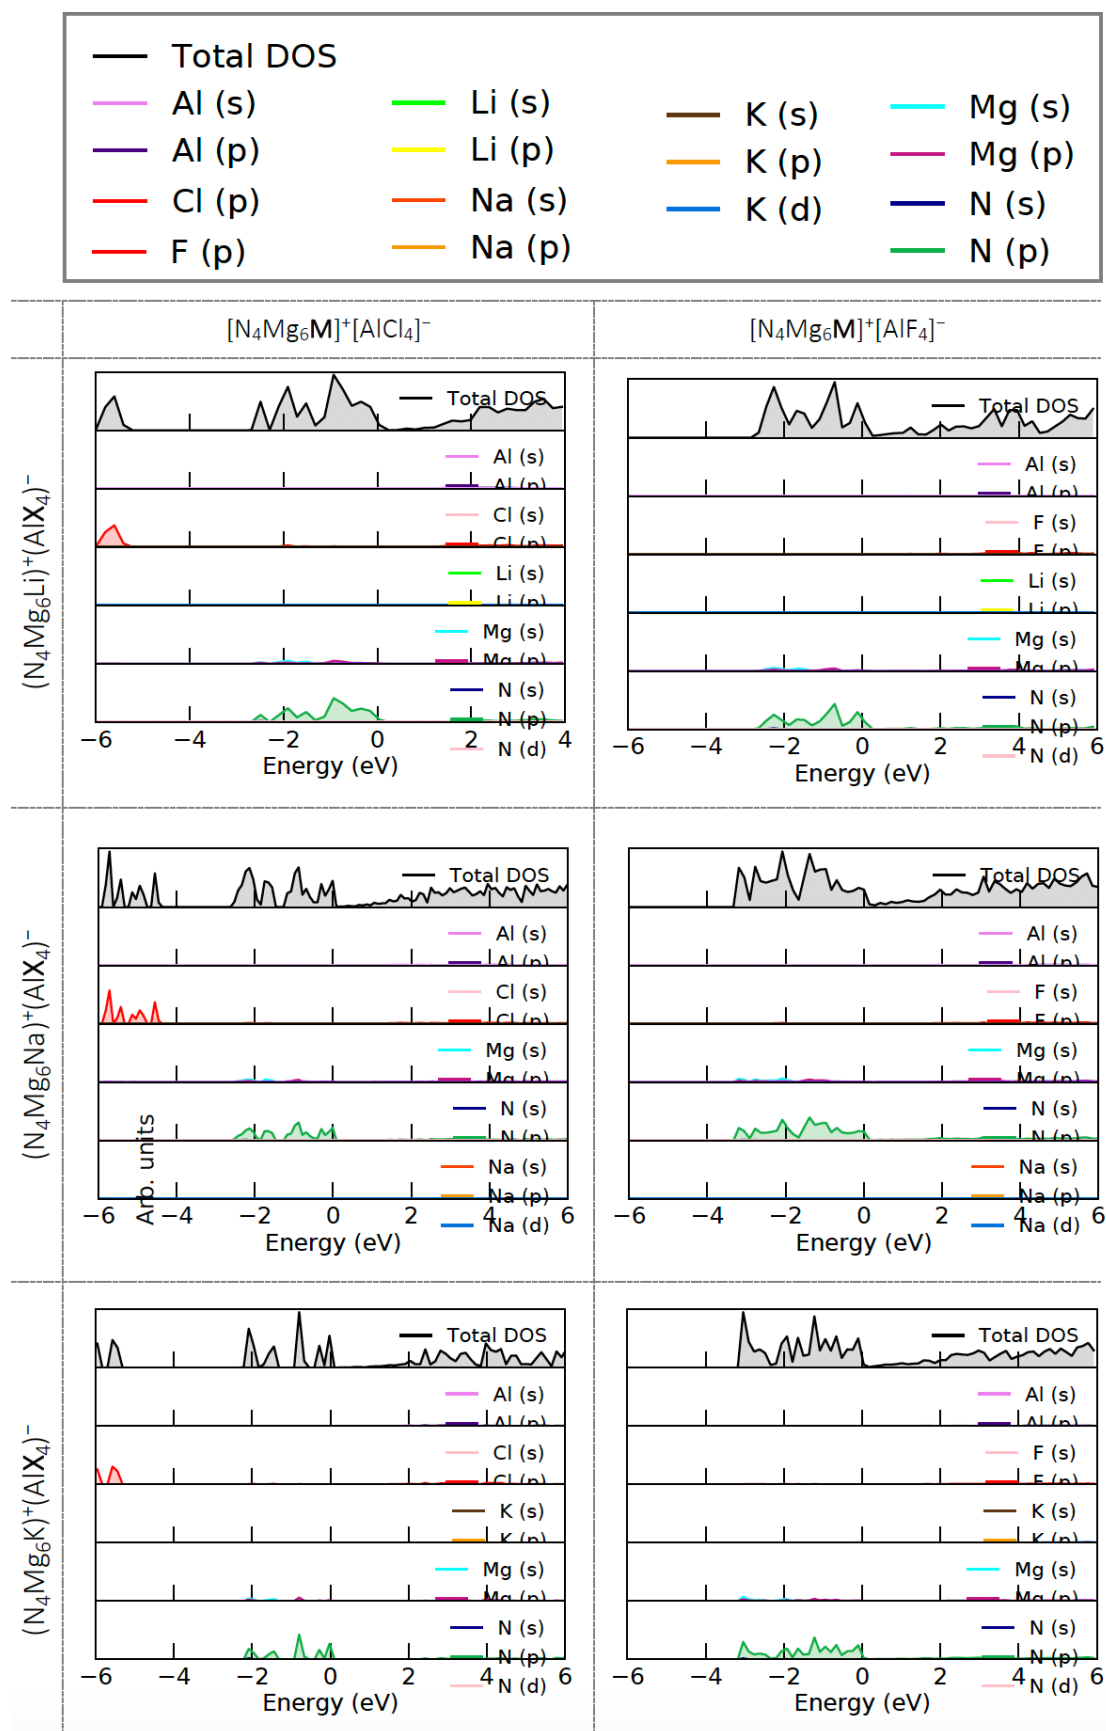

Figure S 4. DOS for dZnS phase of  $[N_4Mg_6M]^+[AlX_4]^-$  as obtained from PBE-D3.



## 2.7. The positions of ions and the lattice geometry

Below, we provide the positions of the ions and the lattice geometry as have been written in POSCAR files.

### dNaCl phase of $N_4Mg_6Li-AlCl_4$

```
1.0
  12.1437397003    0.0000000000    0.0000000000
  12.7077213525    13.8574381977    0.0000000000
  9.8289620328     8.3059612024    11.8521487704
Li  N Mg Al  Cl
  1  4  6  1  4
Cartesian
  16.123947144    8.130017281    4.385201931
  16.952489853    9.541401863    5.144154072
  16.375167847    12.913895607    6.477078915
  19.388542175    12.205095291    4.700802803
  18.857549667    10.824999809    7.920364857
  15.923585892    11.203112602    5.674460888
  17.442058563    12.179022789    7.959528446
  17.960391998    9.454777718    6.896099567
  19.946853638    11.612910271    6.491164684
  18.390552521    10.620136261    4.217730999
  17.877708435    13.325238228    5.268257141
  23.949098587    13.844906807    0.018128403
  1.230318189     0.256681144    0.212793976
  23.039657593    13.825656891    1.965898275
  20.257383347    9.878129005    10.679673195
  21.239336014    20.266952515    10.879776955
```

---

### dNaCl phase of $N_4Mg_6Na-AlCl_4$

```
1.0
  11.6188058853    0.0000000000    0.0000000000
  8.2108258663     15.3338895496    0.0000000000
  10.1633747223    9.0009499276    11.7284071351
Na  N Mg Al  Cl
  1  4  6  1  4
Cartesian
  14.109049797    8.605779648    4.327173710
  14.776293755    10.563177109    5.021842957
  13.620538712    13.821369171    6.238298416
  16.664253235    13.558148384    4.435431957
  16.462059021    12.254500389    7.740195274
  13.474553108    12.024142265    5.503787994
  14.820756912    13.334778786    7.721824646
  15.795716286    10.725337029    6.749980927
  17.349567413    13.151018143    6.231971741
```

|              |              |              |
|--------------|--------------|--------------|
| 15.969140053 | 11.808060646 | 3.985558510  |
| 14.992930412 | 14.444652557 | 4.967744827  |
| 19.219068527 | 15.257740021 | 0.319221050  |
| 9.730149269  | 15.532999039 | 0.465001225  |
| 18.384120941 | 15.088608742 | 2.280879259  |
| 20.274343491 | 10.572014809 | 11.008125305 |
| 17.345462799 | 22.436750412 | 10.966012001 |

---

**dNaCl phase of N<sub>4</sub>Mg<sub>6</sub>K-AlCl<sub>4</sub>**

1.0

|               |               |               |
|---------------|---------------|---------------|
| 16.0211429596 | 0.0000000000  | 0.0000000000  |
| 8.8343197179  | 13.3062615915 | 0.0000000000  |
| 10.3239831084 | -1.7227752454 | 12.5239377546 |

K N Mg Al Cl  
1 4 6 1 4

Cartesian

|              |              |              |
|--------------|--------------|--------------|
| 16.808580399 | 2.567688704  | 2.840664864  |
| 17.269563675 | 4.380910873  | 4.693862438  |
| 15.652656555 | 6.799100876  | 6.887006283  |
| 18.917886734 | 7.500524521  | 5.576979160  |
| 18.496932983 | 4.951328278  | 8.067481995  |
| 15.773736000 | 5.425181389  | 5.500241280  |
| 16.754302979 | 5.860033512  | 8.225835800  |
| 18.076000214 | 3.923085690  | 6.459573269  |
| 19.422023773 | 6.438875675  | 7.160861492  |
| 18.420352936 | 5.990332603  | 4.439532757  |
| 17.098352432 | 7.945898056  | 6.191030979  |
| 16.159187317 | 0.317667127  | 0.500896811  |
| 2.184621096  | 1.026124120  | 0.494792998  |
| 24.637928009 | 12.925080299 | 2.519968510  |
| 14.948822975 | 2.099929333  | 0.309980005  |
| 18.922054291 | 10.447169304 | 11.536885262 |

---

**dNaCl phase of N<sub>4</sub>Mg<sub>6</sub>Li-AlF<sub>4</sub>**

1.0

|              |              |              |
|--------------|--------------|--------------|
| 8.2963647842 | 0.0000000000 | 0.0000000000 |
| 2.4762573158 | 6.5856810352 | 0.0000000000 |
| 3.3830958086 | 2.2836438114 | 7.2570322922 |

N Mg Al F Li  
4 6 1 4 1

Cartesian

|              |             |             |
|--------------|-------------|-------------|
| 7.484244823  | 3.233193636 | 2.604689121 |
| 4.820322037  | 5.236618519 | 3.749040127 |
| 7.979525089  | 6.827735424 | 3.396810293 |
| 7.360050678  | 4.329019070 | 5.981033325 |
| 5.552226067  | 3.676822901 | 2.811433792 |
| 5.469958782  | 4.668256760 | 5.526824474 |
| 7.809274673  | 3.094253063 | 4.561948776 |
| 8.012446404  | 6.052554607 | 5.284998417 |
| 8.113057137  | 5.085024834 | 2.426369667 |
| 5.981769562  | 6.716495037 | 3.300990105 |
| 6.205443859  | 8.603759766 | 6.991270065 |
| 4.245002747  | 3.245478868 | 5.935839653 |
| 11.185162544 | 6.961010456 | 1.263439059 |

|              |             |             |
|--------------|-------------|-------------|
| 12.932163239 | 8.172604561 | 6.662016869 |
| 7.281083107  | 7.321647167 | 6.665443897 |
| 7.378832817  | 1.413878322 | 2.118439198 |

---

**dNaCl phase of  $N_4Mg_6Na-AlF_4$**

1.0

|              |              |              |
|--------------|--------------|--------------|
| 7.3119087219 | 0.0000000000 | 0.0000000000 |
| 1.9615717968 | 7.1254282223 | 0.0000000000 |
| 1.7922046997 | 2.5140953145 | 6.6598512587 |

|   |    |    |   |    |
|---|----|----|---|----|
| N | Mg | Al | F | Na |
| 4 | 6  | 1  | 4 | 1  |

Cartesian

|             |             |             |
|-------------|-------------|-------------|
| 6.054072857 | 3.620164871 | 2.418287516 |
| 3.278635502 | 5.646234989 | 3.329203129 |
| 6.410636425 | 7.157509327 | 3.015608072 |
| 5.670924664 | 4.784308910 | 5.717621326 |
| 4.162408352 | 4.194770813 | 2.342290163 |
| 3.798196554 | 5.016440392 | 5.118526459 |
| 6.217169285 | 3.454859734 | 4.380907536 |
| 6.320736408 | 6.462417126 | 4.887226582 |
| 6.873811722 | 5.403318405 | 2.196261644 |
| 4.439660549 | 7.128968716 | 2.793731451 |
| 4.122291088 | 9.376958847 | 6.474014282 |
| 2.654790401 | 3.430787563 | 5.354003429 |
| 0.509424686 | 0.578200400 | 1.264842868 |
| 9.788086891 | 9.045392036 | 6.246946335 |
| 5.071404934 | 7.987343311 | 6.213206291 |
| 5.755572796 | 1.472442269 | 1.749379277 |

---

**dNaCl phase of  $N_4Mg_6K-AlF_4$**

1.0

|               |              |              |
|---------------|--------------|--------------|
| 11.0553932190 | 0.0000000000 | 0.0000000000 |
| 5.7240308843  | 9.8151548573 | 0.0000000000 |
| 4.7547705557  | 2.7040884911 | 9.0113067026 |

|   |   |    |    |   |
|---|---|----|----|---|
| K | N | Mg | Al | F |
| 1 | 4 | 6  | 1  | 4 |

Cartesian

|              |              |             |
|--------------|--------------|-------------|
| 10.856709480 | 2.830663204  | 1.760033607 |
| 10.825547218 | 4.857167244  | 3.411291599 |
| 8.691488266  | 7.499320030  | 4.764267445 |
| 12.149277687 | 8.150138855  | 4.128197670 |
| 11.190888405 | 5.987413406  | 6.835669041 |
| 9.166031837  | 5.942535877  | 3.679757833 |
| 9.452496529  | 6.821570396  | 6.444209576 |
| 11.195993423 | 4.697113037  | 5.368284702 |
| 12.264095306 | 7.366554737  | 5.929408073 |
| 11.977679253 | 6.463913918  | 3.165623188 |
| 10.234634399 | 8.593727112  | 4.225868225 |
| 10.560482979 | 12.402822495 | 8.948824883 |
| 5.434547901  | 3.733328581  | 7.860495567 |
| 11.575264931 | 0.501950681  | 1.474137902 |
| 19.938716888 | 12.409403801 | 8.879892349 |
| 11.226198196 | 10.860038757 | 8.731470108 |

---

**dCsI phase of N<sub>4</sub>Mg<sub>6</sub>Li-AlCl<sub>4</sub>**

1.0

|              |              |              |
|--------------|--------------|--------------|
| 9.4457559586 | 0.0000000000 | 0.0000000000 |
| 0.2141019716 | 9.4403834752 | 0.0000000000 |
| 0.2258592647 | 0.2472323884 | 9.4997140269 |

Al Cl Mg N Li

1 4 6 4 1

Cartesian

|             |             |             |
|-------------|-------------|-------------|
| 0.063173369 | 0.057237815 | 0.058026247 |
| 1.817457914 | 8.568310738 | 8.370824814 |
| 1.400620818 | 1.356582642 | 1.312218189 |
| 8.553030968 | 1.651941657 | 8.414124489 |
| 8.587502480 | 8.351528168 | 1.442525268 |
| 5.079112053 | 4.989421368 | 2.839485407 |
| 5.117799759 | 7.088163376 | 4.893286705 |
| 3.038353682 | 5.016568661 | 4.943675518 |
| 5.144662857 | 5.037695408 | 6.989163876 |
| 5.105335236 | 2.939084768 | 4.934395313 |
| 7.185856342 | 5.011533737 | 4.884946823 |
| 3.777954817 | 3.691186905 | 3.636431217 |
| 6.347605228 | 6.250053406 | 3.607465982 |
| 3.859458923 | 6.282979488 | 6.172354221 |
| 6.379994392 | 3.750312567 | 6.160872936 |
| 2.684964895 | 2.614515781 | 2.587848186 |

---

**dCsI phase of N<sub>4</sub>Mg<sub>6</sub>Na-AlCl<sub>4</sub>**

1.0

|              |              |              |
|--------------|--------------|--------------|
| 7.8741445541 | 0.0000000000 | 0.0000000000 |
| 2.0260886728 | 7.5996888941 | 0.0000000000 |
| 2.0490147299 | 1.5619844042 | 7.4446545197 |

Al Cl Mg N Na

1 4 6 4 1

Cartesian

|              |             |             |
|--------------|-------------|-------------|
| 11.737206459 | 8.989701271 | 7.314239025 |
| 2.163720608  | 1.643716693 | 5.203054428 |
| 1.338383675  | 1.034349203 | 0.835141778 |
| 5.799132824  | 0.663259864 | 0.547540486 |
| 2.164209127  | 5.418537617 | 0.562345088 |
| 6.023328781  | 4.626518726 | 1.835034132 |
| 6.662752628  | 7.074128151 | 3.736974001 |
| 4.215128899  | 5.112431049 | 4.150872707 |
| 6.662119389  | 5.101395607 | 6.142919064 |
| 6.020379543  | 2.736028194 | 4.145362854 |
| 8.542865753  | 4.597017765 | 3.737047672 |
| 4.701719284  | 3.611695766 | 2.930754423 |
| 7.478223801  | 5.740835190 | 2.547524452 |
| 5.488619804  | 6.276237011 | 5.094282627 |
| 7.476668835  | 3.657243490 | 5.091464043 |
| 3.144856453  | 2.429426670 | 1.960179806 |

---

**dCsI phase of N<sub>4</sub>Mg<sub>6</sub>K-AlCl<sub>4</sub>**

1.0

|              |              |              |
|--------------|--------------|--------------|
| 8.5114679337 | 0.0000000000 | 0.0000000000 |
| 1.3969826356 | 8.4463458683 | 0.0000000000 |

|              |              |              |              |
|--------------|--------------|--------------|--------------|
|              | 1.3606499738 | 3.6469088046 | 7.5901695196 |
| Al           | Cl           | Mg           | N K          |
| 1            | 4            | 6            | 4 1          |
| Cartesian    |              |              |              |
| 11.029224396 | 12.040990829 | 7.562627792  |              |
| 1.821749926  | 6.533607006  | 0.883377016  |              |
| 0.925564051  | 1.486765027  | 0.953903198  |              |
| 1.797515988  | 3.612660646  | 5.496608734  |              |
| 6.206965446  | 0.396408856  | 0.252578437  |              |
| 5.840446472  | 4.263812542  | 4.396738052  |              |
| 8.284817696  | 6.096166611  | 3.831740618  |              |
| 5.850462914  | 5.820864677  | 1.934614420  |              |
| 6.199152946  | 8.350624084  | 3.526664019  |              |
| 3.916461229  | 6.508100510  | 4.073831081  |              |
| 6.192945480  | 6.802459240  | 5.970874310  |              |
| 4.520728111  | 4.885595322  | 3.061828613  |              |
| 7.258094311  | 5.292999744  | 5.282682896  |              |
| 7.268982410  | 7.067572594  | 2.477831125  |              |
| 4.934378147  | 7.934121132  | 4.971994400  |              |
| 2.470744371  | 3.606487989  | 2.248376846  |              |

---

**dCsI phase of  $N_4Mg_6Li-AlF_4$**

|     |               |               |              |
|-----|---------------|---------------|--------------|
| 1.0 | 9.2360410690  | 0.0000000000  | 0.0000000000 |
|     | -0.3451986950 | 9.2283777783  | 0.0000000000 |
|     | -0.3078546046 | -0.3212621665 | 9.2256319180 |

Al F Mg N Li  
1 4 6 4 1

|             |             |             |  |
|-------------|-------------|-------------|--|
| Cartesian   |             |             |  |
| 0.174845070 | 0.181675807 | 0.197690666 |  |
| 0.618011713 | 8.207673073 | 8.508811951 |  |
| 1.146282315 | 1.188854337 | 1.239661336 |  |
| 8.181824684 | 0.923302770 | 8.509241104 |  |
| 8.148335457 | 8.457267761 | 1.229395032 |  |
| 4.439478397 | 4.607137203 | 2.659343958 |  |
| 4.372745514 | 6.648082733 | 4.773436069 |  |
| 2.334768534 | 4.531859398 | 4.692855835 |  |
| 4.376210213 | 4.541669369 | 6.806839943 |  |
| 4.443064213 | 2.501260042 | 4.692838192 |  |
| 6.481439114 | 4.617084026 | 4.773418903 |  |
| 3.146096468 | 3.264388561 | 3.378358364 |  |
| 5.656588554 | 5.870849609 | 3.502103329 |  |
| 3.087998867 | 5.779316902 | 5.983458996 |  |
| 5.661274910 | 3.300826788 | 5.983417034 |  |
| 2.103459358 | 2.182125092 | 2.261163235 |  |

---

**dCsI phase of  $N_4Mg_6Na-AlF_4$**

|     |              |              |              |
|-----|--------------|--------------|--------------|
| 1.0 | 7.3566818237 | 0.0000000000 | 0.0000000000 |
|     | 1.3840652699 | 7.2185476170 | 0.0000000000 |
|     | 1.3868314783 | 1.1436523532 | 7.1325790922 |

Al F Mg N Na  
1 4 6 4 1

Cartesian

|             |             |             |
|-------------|-------------|-------------|
| 9.840214729 | 8.121125221 | 6.931663036 |
| 1.354372859 | 1.110992670 | 5.269407749 |
| 0.883962631 | 0.738322794 | 0.626846015 |
| 5.534467697 | 0.304611444 | 0.266013503 |
| 1.360354662 | 5.372713089 | 0.276196480 |
| 5.242788792 | 4.332562447 | 1.761869788 |
| 5.695048809 | 6.753268719 | 3.682531357 |
| 3.370624065 | 4.690836430 | 3.997735262 |
| 5.695576191 | 4.704405308 | 6.086281776 |
| 5.244650841 | 2.429326057 | 3.998753786 |
| 7.709528446 | 4.316776276 | 3.680544615 |
| 3.875850201 | 3.201448202 | 2.728950262 |
| 6.631165981 | 5.477019310 | 2.533815384 |
| 4.558102608 | 5.874188900 | 5.008652687 |
| 6.633847713 | 3.367951393 | 5.009970665 |
| 2.326257706 | 1.920953870 | 1.634949088 |

---

**dCsI** phase of  $N_4Mg_6K-AlF_4$

1.0

|              |              |              |
|--------------|--------------|--------------|
| 7.3873500824 | 0.0000000000 | 0.0000000000 |
| 2.3469223523 | 6.9798631655 | 0.0000000000 |
| 2.4046039229 | 1.7723641967 | 6.8494042717 |

Al F Mg N K

1 4 6 4 1

Cartesian

|              |             |             |
|--------------|-------------|-------------|
| 0.337242544  | 0.220159292 | 0.194508240 |
| 9.917944908  | 3.593489408 | 6.505883694 |
| 11.231784821 | 8.050787926 | 6.289340973 |
| 6.553511143  | 8.282495499 | 6.511379242 |
| 9.799353600  | 7.026969910 | 1.869028807 |
| 5.982636929  | 6.101014137 | 2.933170319 |
| 5.115692139  | 3.697825670 | 0.914974332 |
| 7.671012402  | 3.746288061 | 2.932596922 |
| 5.109682083  | 1.815503001 | 3.370446444 |
| 5.997145176  | 4.336261749 | 5.255395412 |
| 3.308610439  | 4.309136391 | 3.369541883 |
| 7.403659344  | 5.337589264 | 4.175339222 |
| 4.500424385  | 5.163464069 | 2.066276789 |
| 6.314188480  | 2.639417648 | 2.056919098 |
| 4.513151646  | 3.281917572 | 4.531613827 |
| 9.424457550  | 6.791789055 | 5.243528366 |

---

**dZnS** phase of  $N_4Mg_6Li-AlCl_4$

1.0

|              |              |              |
|--------------|--------------|--------------|
| 7.2482247353 | 0.0000000000 | 0.0000000000 |
| 3.2379803073 | 6.6851815083 | 0.0000000000 |
| 3.7466937615 | 2.2356286051 | 6.4800873326 |

Mg N Li Al Cl

6 4 1 1 4

Cartesian

|             |             |             |
|-------------|-------------|-------------|
| 7.839487076 | 3.283279896 | 1.924229503 |
| 8.610732079 | 6.035164356 | 2.343698502 |
| 5.754899025 | 5.412484646 | 2.504255533 |
| 7.317896843 | 6.229508400 | 4.925728321 |

|              |             |             |
|--------------|-------------|-------------|
| 6.501388073  | 3.444824934 | 4.536676884 |
| 9.370955467  | 4.052566051 | 4.343323708 |
| 5.972781181  | 3.441632986 | 2.615888119 |
| 9.559966087  | 4.246171951 | 2.347852230 |
| 6.986596584  | 6.872258186 | 3.068068504 |
| 7.864672661  | 4.442196846 | 5.565157413 |
| 4.141841888  | 2.708681583 | 1.953759193 |
| 0.345491529  | 0.134072766 | 0.302678406 |
| 12.820941925 | 8.224664688 | 5.915380478 |
| 10.993103981 | 7.279005051 | 2.400094748 |
| 11.526214600 | 4.373383522 | 5.888461590 |
| 9.081541061  | 7.971695423 | 6.132845402 |

---

**dZnS** phase of  $N_4Mg_6Na-AlCl_4$

1.0

|              |              |              |
|--------------|--------------|--------------|
| 7.3212351799 | 0.0000000000 | 0.0000000000 |
| 3.3265867355 | 8.4874634624 | 0.0000000000 |
| 3.7368250481 | 1.9226174603 | 6.2622304114 |

Mg N Na Al Cl

6 4 1 1 4

Cartesian

|             |              |             |
|-------------|--------------|-------------|
| 6.376979828 | 6.534925461  | 3.685040951 |
| 5.000317097 | 5.576819897  | 1.284865618 |
| 7.925308228 | 5.223011494  | 1.489133358 |
| 6.152397156 | 2.857104778  | 1.806935310 |
| 7.620537281 | 3.888435125  | 4.156392574 |
| 4.625113487 | 4.200571537  | 3.937671661 |
| 8.118970871 | 5.656304359  | 3.404198647 |
| 4.557468414 | 6.009737492  | 3.162827253 |
| 6.411186695 | 4.364986897  | 0.517191350 |
| 6.012744904 | 2.815677166  | 3.783733606 |
| 9.996762276 | 6.614188671  | 4.373641968 |
| 6.841628551 | 10.062458038 | 6.064869881 |
| 9.062775612 | 8.861804962  | 1.311035514 |
| 9.976684570 | 2.400302172  | 4.233105183 |
| 5.109666824 | 8.185284615  | 0.488817155 |
| 6.395115376 | 7.866002083  | 6.007057190 |

---

**dZnS** phase of  $N_4Mg_6K-AlCl_4$

1.0

|              |              |              |
|--------------|--------------|--------------|
| 8.1269683838 | 0.0000000000 | 0.0000000000 |
| 4.0517796518 | 7.0376690942 | 0.0000000000 |
| 4.0680375518 | 2.3431939721 | 6.6374182445 |

Mg N K Al Cl

6 4 1 1 4

Cartesian

|              |             |             |
|--------------|-------------|-------------|
| 8.994054794  | 3.514097691 | 2.381412745 |
| 10.384674072 | 6.116188526 | 2.475119829 |
| 7.432787895  | 6.018470287 | 2.497328520 |
| 8.902346611  | 6.819983482 | 4.929218769 |
| 7.512624264  | 4.216522694 | 4.836334705 |
| 10.463834763 | 4.315455437 | 4.814637184 |
| 7.175408840  | 4.097953320 | 2.891544819 |

|              |             |             |
|--------------|-------------|-------------|
| 10.777832031 | 4.218170643 | 2.864371300 |
| 8.872252464  | 7.275255203 | 3.005529165 |
| 8.968651772  | 5.076581478 | 5.860681057 |
| 4.885251045  | 2.820189714 | 1.995845079 |
| 0.824140131  | 0.475513160 | 0.337539285 |
| 10.689627647 | 8.804863930 | 6.282488823 |
| 13.050709724 | 4.834177494 | 6.219838142 |
| 15.301654816 | 8.856229782 | 6.270521641 |
| 13.000431061 | 7.554299831 | 2.489091635 |

---

**dZnS** phase of  $N_4Mg_6Li-AlF_4$

1.0

|              |              |              |
|--------------|--------------|--------------|
| 8.0763034821 | 0.0000000000 | 0.0000000000 |
| 2.9893531589 | 6.2901490393 | 0.0000000000 |
| 3.0922405516 | 2.2433421719 | 5.8043202744 |

Mg N Li Al F  
6 4 1 1 4

Cartesian

|              |             |             |
|--------------|-------------|-------------|
| 8.741708755  | 3.595942497 | 3.642537355 |
| 7.419517040  | 2.521132469 | 1.156412721 |
| 5.768519402  | 3.170653820 | 3.477313519 |
| 5.737245560  | 4.947399616 | 0.972735822 |
| 6.857778549  | 5.878010750 | 3.497908115 |
| 8.694988251  | 5.247183323 | 1.212360859 |
| 7.073143482  | 4.213146210 | 4.525355816 |
| 9.094182968  | 3.385069609 | 1.718186378 |
| 5.545615196  | 3.068682194 | 1.522782564 |
| 7.043117523  | 6.297810555 | 1.581662297 |
| 4.133636475  | 1.857108116 | 0.736300290 |
| 3.003481865  | 2.289968252 | 5.277630329 |
| 10.616876602 | 3.851391315 | 4.744555473 |
| 10.571693420 | 6.512235641 | 1.130484343 |
| 7.595794201  | 8.073440552 | 4.916934013 |
| 12.911085129 | 7.509762764 | 4.686314106 |

---

**dZnS** phase of  $N_4Mg_6Na-AlF_4$

1.0

|              |              |              |
|--------------|--------------|--------------|
| 8.0763034821 | 0.0000000000 | 0.0000000000 |
| 2.9893529542 | 6.2901486086 | 0.0000000000 |
| 3.0922409659 | 2.2433424236 | 5.8043199564 |

Mg N Li Al F  
6 4 1 1 4

Cartesian

|             |             |             |
|-------------|-------------|-------------|
| 8.741705894 | 3.595939398 | 3.642535925 |
| 7.419518948 | 2.521130800 | 1.156412005 |
| 5.768524647 | 3.170656919 | 3.477315664 |
| 5.737241268 | 4.947398663 | 0.972734332 |
| 6.857775688 | 5.878008842 | 3.497909546 |
| 8.694991112 | 5.247184753 | 1.212359905 |
| 7.073146343 | 4.213143826 | 4.525355339 |
| 9.094186783 | 3.385070801 | 1.718188882 |
| 5.545617104 | 3.068684101 | 1.522780776 |
| 7.043119907 | 6.297812939 | 1.581659794 |



|              |             |             |
|--------------|-------------|-------------|
| 4.133637428  | 1.857107878 | 0.736301184 |
| 3.003486633  | 2.289969921 | 5.277630329 |
| 10.616874695 | 3.851389170 | 4.744555473 |
| 10.571690559 | 6.512235641 | 1.130484104 |
| 7.595793247  | 8.073441505 | 4.916932106 |
| 12.911083221 | 7.509761333 | 4.686315060 |

---

**dZnS** phase of  $N_4Mg_6K-AlF_4$

1.0

|              |              |              |
|--------------|--------------|--------------|
| 5.8556785583 | 0.0000000000 | 0.0000000000 |
| 1.3830068056 | 7.5825313263 | 0.0000000000 |
| 2.7063251467 | 1.7307183508 | 6.5674443695 |

Mg N K Al F  
6 4 1 1 4

Cartesian

|             |             |             |
|-------------|-------------|-------------|
| 6.761940002 | 4.392823219 | 2.268697739 |
| 6.918702602 | 7.261553288 | 3.122364759 |
| 4.033015728 | 5.700304508 | 2.726112127 |
| 5.025623798 | 6.543181896 | 5.272932529 |
| 4.817797661 | 3.591478825 | 4.578132629 |
| 7.424364567 | 4.910500050 | 5.123794556 |
| 4.940977573 | 3.845946312 | 2.623966932 |
| 7.970463753 | 5.566680431 | 3.323017120 |
| 4.984113693 | 7.363774300 | 3.473431110 |
| 5.620276928 | 4.775535107 | 5.959651947 |
| 3.234620333 | 1.952047467 | 1.850046992 |
| 8.226595879 | 1.810582638 | 6.404568195 |
| 4.786188602 | 8.040641785 | 6.533564091 |
| 2.886077166 | 3.086188316 | 5.352822781 |
| 8.024843216 | 8.975398064 | 6.072780609 |
| 5.794246197 | 0.732757270 | 1.398939252 |

**References:**

1. Kresse, G.; Hafner, J., Ab initio molecular dynamics for liquid metals. *Phys Rev B Condens Matter* **1993**, 47, 558-561.
2. Kresse, G.; Hafner, J., Ab initio molecular-dynamics simulation of the liquid-metal-amorphous-semiconductor transition in germanium. *Phys Rev B Condens Matter* **1994**, 49, 14251-14269.
3. Kresse, G.; Furthmüller, J., Efficiency of ab-initio total energy calculations for metals and semiconductors using a plane-wave basis set. *Comp Mater Sci* **1996**, 6, 15-50.
4. Furthmüller, J.; Hafner, J.; Kresse, G., Dimer reconstruction and electronic surface states on clean and hydrogenated diamond (100) surfaces. *Phys Rev B Condens Matter* **1996**, 53, 7334- 7351.
5. Anderson, L. N., et al., Halogen Bonding Interactions: Revised Benchmarks and a New Assessment of Exchange vs Dispersion. *J Chem Theory Comput* **2018**, 14, 180-190.
6. Sikorska, C.; Gaston, N., Bimetallic superalkali substitution in the CsPbBr<sub>3</sub> perovskite: Pseudocubic phases and tunable bandgap. *J Chem Phys* **2021**, 155, 174307.
